# Supplementary material for: Broad-Spectrum Antibiotic Use and Disease Progression in Early-Stage Melanoma Patients: A Retrospective Cohort Study
Source: MDPI journal article supplement (doi:10.3390/cancers13174367), 2021-08-29
Supplement: s1 [file s1]

**Supplementary table S1: Diagnosis, procedure and drug codes used in the study**

| <b>Diseases</b>                   | <b>ICD-9 CM and ICD-10 CM Codes</b>                                                                                                                                                                                                                                                                                                                                                                                                                                                                                                                                                                                                                                                                                                                                                                                                                                                                                                                                                                                 |
|-----------------------------------|---------------------------------------------------------------------------------------------------------------------------------------------------------------------------------------------------------------------------------------------------------------------------------------------------------------------------------------------------------------------------------------------------------------------------------------------------------------------------------------------------------------------------------------------------------------------------------------------------------------------------------------------------------------------------------------------------------------------------------------------------------------------------------------------------------------------------------------------------------------------------------------------------------------------------------------------------------------------------------------------------------------------|
| Melanoma                          | <p>"1720", "1721", "1722", "1723", "1724", "1725", "1726", "1727", "1728", "1729" (ICD-9 CM)</p> <p>"C430", "C4310", "C4311", "C4312", "C4320", "C4321", "C4322", "C4330", "C4331", "C4339", "C434", "C4351", "C4352", "C4359", "C4360", "C4361", "C4362", "C4370", "C4371", "C4372", "C438", "C439", "D030", "D0310", "D0311", "D0312", "D0320", "D0321", "D0322", "D0330", "D0339", "D034", "D0351", "D0352", "D0359", "D0360", "D0361", "D0362", "D0370", "D0371", "D0372", "D038", "D039" (ICD-10 CM)</p>                                                                                                                                                                                                                                                                                                                                                                                                                                                                                                       |
| Other cancers                     | <p>"140x", "141x", "142x", "143x", "144x", "145x", "146x", "147x", "148x", "149x", "150x", "151x", "152x", "153x", "154x", "155x", "156x", "157x", "158x", "159x", "160x", "161x", "162x", "163x", "164x", "165x", "166x", "167x", "168x", "169x", "170x", "171x", "174x", "175x", "176x", "177x", "178x", "179x", "180x", "181x", "182x", "183x", "184x", "185x", "186x", "187x", "188x", "189x", "190x", "191x", "192x", "193x", "194x", "195x", "200xx", "201xx", "202xx", "203xx", "204xx", "205xx", "206xx", "207xx", "208xx" (ICD-9 CM)</p> <p>"C0xx", "C1xx", "C20x", "C21x", "C22x", "C23x", "C24x", "C25x", "C26x", "C30x", "C31x", "C32x", "C33x", "C34x", "C37x", "C38x", "C39x", "C40x", "C41x", "C45x", "C46x", "C47x", "C48x", "C49x", "C50x", "C51x", "C52x", "C53x", "C54x", "C55x", "C56x", "C57x", "C58x", "C6xx", "C71x", "C72x", "C73x", "C74x", "C75x", "C76x", "C81x", "C82x", "C83x", "C84x", "C85x", "C88x", "C90x", "C91x", "C92x", "C93x", "C94x", "C95x", "C96x", "C97x" (ICD-10 CM)</p> |
| Secondary malignancy (metastasis) | <p>"196x", "197x", "198x" (ICD-9 CM)</p> <p>"C77x", "C78x", "C79x" (ICD-10 CM)</p>                                                                                                                                                                                                                                                                                                                                                                                                                                                                                                                                                                                                                                                                                                                                                                                                                                                                                                                                  |
| Rheumatoid arthritis              | <p>"7140", "7141", "7142" (ICD-9 CM)</p> <p>"M069", "M0500", "M0530", "M0560", "M061" (ICD-10 CM)</p>                                                                                                                                                                                                                                                                                                                                                                                                                                                                                                                                                                                                                                                                                                                                                                                                                                                                                                               |

|                              |                                                                                                                                                                                                                                                                                                                                                                                                                                                |
|------------------------------|------------------------------------------------------------------------------------------------------------------------------------------------------------------------------------------------------------------------------------------------------------------------------------------------------------------------------------------------------------------------------------------------------------------------------------------------|
| Systemic lupus erythematosus | "7100", "M3210"                                                                                                                                                                                                                                                                                                                                                                                                                                |
| Systemic sclerosis           | "7101", "M340", "M341", "M349"                                                                                                                                                                                                                                                                                                                                                                                                                 |
| HIV                          | "042", "043", "044", "B20", "B21", "B22", "B23", "B24"                                                                                                                                                                                                                                                                                                                                                                                         |
| Organ transplantation        | "V420", "V421", "V422", "V426", "V427", "V428", "V429",<br>"9968"<br><br>"T8600", "T8601", "T8602", "T8609", "T8610", "T8611",<br>"T8612", "T8620", "T8621", "T8622", "T8640", "T8641",<br>"T8642", "T865", "T86810", "T86811", "T86819", "T86850",<br>"T86851", "T86859", "T86890", "T86891", "T86899", "T8690",<br>"T8691", "T8692", "T8699", "Z940", "Z941", "Z942", "Z944",<br>"Z9481", "Z9482", "Z9483", "Z9484", "Z9489", "Z949", "Z953" |
| Multiple sclerosis           | "340", "G35"                                                                                                                                                                                                                                                                                                                                                                                                                                   |
|                              |                                                                                                                                                                                                                                                                                                                                                                                                                                                |
| <b>Procedures</b>            | <b>HCCPS codes</b>                                                                                                                                                                                                                                                                                                                                                                                                                             |
| Melanoma surgery             | "11600", "11601", "11602", "11603", "11604", "11605",<br>"11606", "11610", "11611", "11612", "11613", "11614",<br>"11615", "11616", "11620", "11621", "11622", "11623",<br>"11624", "11625", "11626", "11630", "11631", "11632",<br>"11633", "11634", "11635", "11636", "11640", "11641",<br>"11642", "11643", "11644", "11645", "11646",<br><br>"17311", "17312", "17313", "17314", "17315"                                                   |
| Lymphadenectomy              | "38740", "38745"                                                                                                                                                                                                                                                                                                                                                                                                                               |
| Sentinel lymph node excision | "38500", "38505", "38525", "38510", "38520", "38530"                                                                                                                                                                                                                                                                                                                                                                                           |
| Chemotherapy                 | Paclitaxel – "J9264", "J9267", "J9265", "C9431"<br><br>Cisplatin – "J9062", "C9418", "J9060"<br><br>Carboplatin – "J9045"                                                                                                                                                                                                                                                                                                                      |

|                   |                                                                                                                                                                                                                                                                                                                                                                                                                                                                                                                                                                                                                                                                                                          |
|-------------------|----------------------------------------------------------------------------------------------------------------------------------------------------------------------------------------------------------------------------------------------------------------------------------------------------------------------------------------------------------------------------------------------------------------------------------------------------------------------------------------------------------------------------------------------------------------------------------------------------------------------------------------------------------------------------------------------------------|
|                   | <p>Vinblastin – "J9360"</p> <p>Carmustine – "J9050", "C9437"</p> <p>Decarbazine – "J9130", "J9140"</p> <p>Docetaxel – "J9170", "J9171"</p> <p>Temozolomide – "J9328", "C1086", "J8700"</p> <p>Granulocyte-macrophage colony-stimulating factor – "J2820"</p>                                                                                                                                                                                                                                                                                                                                                                                                                                             |
| Radiation therapy | <p>"76873", "77014", "77261", "77262", "77263", "77280", "77285", "77290", "77293", "77295", "77300", "77301", "77305", "77310", "77315", "77321", "77326", "77327", "77328", "77331", "77332", "77333", "77334", "77336", "77338", "77370", "77371", "77372", "77373", "77401", "77417", "77427", "77431", "77432", "77435", "77470", "77520", "77522", "77523", "77525", "77750", "77761", "77762", "77763", "77776", "77777", "77778", "77785", "77786", "77787", "77789", "77790", "77799", "G0173", "G0251", "G0339", "G0340", "S2095", "G6001", "G6002", "G6003", "G6004", "G6005", "G6006", "G6007", "G6008", "G6009", "G6010", "G6011", "G6012", "G6013", "G6014", "G6015", "G6016", "G6017"</p> |
| Immunotherapy     | <p>Interferon alfa-2a – "J9213"</p> <p>Interferon alfa-2b – "S0146", "J9214"</p> <p>Interferon alfacon-1 – "J9212"</p> <p>Interferon beta-1a – "J1826"</p> <p>Ipilimumab – "C9284", "J9228"</p> <p>Nivolumab – "J9299"</p> <p>Pembrolizumab – "J9271"</p> <p>Atezolizumab – "J9022"</p> <p>Durvalumab – "J9173"</p>                                                                                                                                                                                                                                                                                                                                                                                      |
| Targeted therapy  | National Drug Codes (NDC)                                                                                                                                                                                                                                                                                                                                                                                                                                                                                                                                                                                                                                                                                |

|                    |                                                                                                                                                                                                                                 |
|--------------------|---------------------------------------------------------------------------------------------------------------------------------------------------------------------------------------------------------------------------------|
|                    | <p>Encorafenib – "70255002501", "702550025502"</p> <p>Binimetinib - "70255001002"</p> <p>Dabrafenib – "00078068166"</p> <p>Trametinib – "00078066815"</p> <p>Vemurafenib – "50242009002"</p> <p>Cobimetinib – "50242071786"</p> |
| <b>Antibiotics</b> | <b>Generic Product Identifier (GPI) codes</b>                                                                                                                                                                                   |
| Penicillins        | "01"                                                                                                                                                                                                                            |
| Cephalosporins     | "02"                                                                                                                                                                                                                            |
| Tetracyclines      | "04"                                                                                                                                                                                                                            |
| Fluoroquinolones   | "05"                                                                                                                                                                                                                            |
| Aminoglycosides    | "07"                                                                                                                                                                                                                            |
| Sulfonamides       | "08"                                                                                                                                                                                                                            |
| Carbapenems        | "1615"                                                                                                                                                                                                                          |
| Oxazolidinones     | "1623"                                                                                                                                                                                                                          |
| Lincomycin         | "9664581010", "1622001010"                                                                                                                                                                                                      |
| Clindamycin        | "1622002010", "9646642710", "1622002022", "9005990262", "9005990219", "9005101010", "9646642730", "1622002030", "5510001810", "5510001811", "1622002031", "9005990259", "9005990359", "9005990362", "9005990265"                |
| Vancomycin         | "1600006010"                                                                                                                                                                                                                    |
| Chloramphenicol    | "1620001000", "9646563648", "1620001020"                                                                                                                                                                                        |

Statement—Checklist of items that should be included in reports of *cohort studies*

|                      | Item No | Recommendation                                                                                                                  | Page Number | Relevant text from manuscript                                                                                                                                                                               |
|----------------------|---------|---------------------------------------------------------------------------------------------------------------------------------|-------------|-------------------------------------------------------------------------------------------------------------------------------------------------------------------------------------------------------------|
| Title and abstract   | 1       | (a) Indicate the study's design with a commonly used term in the title or the abstract                                          | 1, 2        | Title: retrospective cohort study<br>Methods: retrospective cohort study                                                                                                                                    |
|                      |         | (b) Provide in the abstract an informative and balanced summary of what was done and what was found                             | 1, 2        | Methods: identified patients with malignant melanoma; high-dimensional propensity score approach with inverse weighting<br>Results: final sample included; antibiotic use was associated with 31% reduction |
| <b>Introduction</b>  |         |                                                                                                                                 |             |                                                                                                                                                                                                             |
| Background/rationale | 2       | Explain the scientific background and rationale for the investigation being reported                                            | 3           | Broad-spectrum antibiotics use also interferes with the gut flora; on the contrary, several antibiotic agents such as actinomycin and doxorubicin have antitumor activity                                   |
| Objectives           | 3       | State specific objectives, including any prespecified hypotheses                                                                | 3           | Our study aimed to study the association between                                                                                                                                                            |
| <b>Methods</b>       |         |                                                                                                                                 |             |                                                                                                                                                                                                             |
| Study design         | 4       | Present key elements of study design early in the paper                                                                         | 4           | Conducted a retrospective cohort study; identified patients with at least one diagnosis; excluded patients with other cancers, HIV                                                                          |
| Setting              | 5       | Describe the setting, locations, and relevant dates, including periods of recruitment, exposure, follow-up, and data collection | 4           | IQVIA PharMetrics® Plus data (January 2008–June 2018); diagnosis for malignant melanoma                                                                                                                     |

|                              |    |                                                                                                                                                                                      |         |                                                                                                                                                                                                                                                                                                                               |
|------------------------------|----|--------------------------------------------------------------------------------------------------------------------------------------------------------------------------------------|---------|-------------------------------------------------------------------------------------------------------------------------------------------------------------------------------------------------------------------------------------------------------------------------------------------------------------------------------|
|                              |    |                                                                                                                                                                                      |         | between Jan 01, 2009 and June 30, 2017                                                                                                                                                                                                                                                                                        |
| Participants                 | 6  | (a) Give the eligibility criteria, and the sources and methods of selection of participants. Describe methods of follow-up                                                           | 4       | Required these patients to have undergone either wide local excision or Mohr micrographic surgeries within 90 days of the diagnosis; excluded if they had other treatments                                                                                                                                                    |
|                              |    | (b) For matched studies, give matching criteria and number of exposed and unexposed                                                                                                  |         | N/A                                                                                                                                                                                                                                                                                                                           |
| Variables                    | 7  | Clearly define all outcomes, exposures, predictors, potential confounders, and effect modifiers. Give diagnostic criteria, if applicable                                             | 7, 8    | Progression in the two years after surgery was the primary outcome; exposed group was patients with prescriptions for broad-spectrum antibiotics; used pre-specified covariates; literature has shown these variables could increase the risk of melanoma; used a high-dimensional propensity score variable selection method |
| Data sources/<br>measurement | 8* | For each variable of interest, give sources of data and details of methods of assessment (measurement). Describe comparability of assessment methods if there is more than one group | 7, 8    | Identified broad-spectrum antibiotic users using Generic Product Identifier (GPI) codes in the pharmacy files; developed an algorithm based on plausible clinical scenarios to identify progression; ICD-10 CM codes were used for identifying inpatient and outpatient diagnoses                                             |
| Bias                         | 9  | Describe any efforts to address potential sources of bias                                                                                                                            | 4, 8, 9 | This approach was used to mitigate immortal time bias; Used inverse                                                                                                                                                                                                                                                           |

probability treatment weighting to construct pseudo populations of antibiotic users and non-users that are similar in the covariates; We examined if lack of access to healthcare could explain the difference in progression; We conducted a falsification test

|                        |     |                                                                                                                                                                                                   |        |                                                                                                                                                                                                      |
|------------------------|-----|---------------------------------------------------------------------------------------------------------------------------------------------------------------------------------------------------|--------|------------------------------------------------------------------------------------------------------------------------------------------------------------------------------------------------------|
| Study size             | 10  | Explain how the study size was arrived at                                                                                                                                                         | 10, 11 | Flow diagram                                                                                                                                                                                         |
| Quantitative variables | 11  | Explain how quantitative variables were handled in the analyses. If applicable, describe which groupings were chosen and why                                                                      | 5, 6   | Table 1                                                                                                                                                                                              |
| Statistical methods    | 12  | (a) Describe all statistical methods, including those used to control for confounding                                                                                                             | 8, 9   | High-dimensional propensity score approach was used for covariate assessment; used weighted Cox proportional hazard regression for time to melanoma progression with antibiotics use as the exposure |
|                        |     | (b) Describe any methods used to examine subgroups and interactions                                                                                                                               | N/A    | N/A                                                                                                                                                                                                  |
|                        |     | (c) Explain how missing data were addressed                                                                                                                                                       | N/A    | N/A                                                                                                                                                                                                  |
|                        |     | (d) If applicable, explain how loss to follow-up was addressed                                                                                                                                    | 8      | Patients' time to progression was censored for those who were not considered to be progressed                                                                                                        |
|                        |     | (e) Describe any sensitivity analyses                                                                                                                                                             | 9      | We conducted multiple sensitivity analyses.                                                                                                                                                          |
| <b>Results</b>         |     |                                                                                                                                                                                                   |        |                                                                                                                                                                                                      |
| Participants           | 13* | (a) Report numbers of individuals at each stage of study—eg numbers potentially eligible, examined for eligibility, confirmed eligible, included in the study, completing follow-up, and analysed | 9, 10  | After applying the inclusion and exclusion criteria, a total of 3,930 patients remained in the sample                                                                                                |
|                        |     | (b) Give reasons for non-participation at each stage                                                                                                                                              | 10, 11 | Flow diagram                                                                                                                                                                                         |
|                        |     | (c) Consider use of a flow diagram                                                                                                                                                                | 10, 11 | Flow diagram                                                                                                                                                                                         |

|                   |     |                                                                                                                                                                                                              |        |                                                                                                                                                                                                                                           |
|-------------------|-----|--------------------------------------------------------------------------------------------------------------------------------------------------------------------------------------------------------------|--------|-------------------------------------------------------------------------------------------------------------------------------------------------------------------------------------------------------------------------------------------|
| Descriptive data  | 14* | (a) Give characteristics of study participants (eg demographic, clinical, social) and information on exposures and potential confounders                                                                     | 5, 6   | Table 1                                                                                                                                                                                                                                   |
|                   |     | (b) Indicate number of participants with missing data for each variable of interest                                                                                                                          | 5, 6   | Table 1                                                                                                                                                                                                                                   |
|                   |     | (c) Summarise follow-up time (eg, average and total amount)                                                                                                                                                  | 17, 18 | Table 2                                                                                                                                                                                                                                   |
| Outcome data      | 15* | Report numbers of outcome events or summary measures over time                                                                                                                                               | 17, 18 | Table 2                                                                                                                                                                                                                                   |
| Main results      | 16  | (a) Give unadjusted estimates and, if applicable, confounder-adjusted estimates and their precision (eg, 95% confidence interval). Make clear which confounders were adjusted for and why they were included | 18     | Table 3                                                                                                                                                                                                                                   |
|                   |     | (b) Report category boundaries when continuous variables were categorized                                                                                                                                    | N/A    | N/A                                                                                                                                                                                                                                       |
|                   |     | (c) If relevant, consider translating estimates of relative risk into absolute risk for a meaningful time period                                                                                             | N/A    | N/A                                                                                                                                                                                                                                       |
| Other analyses    | 17  | Report other analyses done—eg analyses of subgroups and interactions, and sensitivity analyses                                                                                                               | 20–22  | Table 4                                                                                                                                                                                                                                   |
| <b>Discussion</b> |     |                                                                                                                                                                                                              |        |                                                                                                                                                                                                                                           |
| Key results       | 18  | Summarise key results with reference to study objectives                                                                                                                                                     | 12     | was found to be associated with reduced risk of progression                                                                                                                                                                               |
| Limitations       | 19  | Discuss limitations of the study, taking into account sources of potential bias or imprecision. Discuss both direction and magnitude of any potential bias                                                   | 13, 14 | The study is subject to methodological limitations; could have confounded the results; this could lead to underestimation of progression; this could potentially explain, at least partially, the lower risk of progression in that group |
| Interpretation    | 20  | Give a cautious overall interpretation of results considering objectives, limitations, multiplicity of analyses, results from similar studies, and other relevant evidence                                   | 14     | Given the retrospective nature of the study with the data lacking clinical information on tumor characteristics                                                                                                                           |
| Generalisability  | 21  | Discuss the generalisability (external validity) of the study results                                                                                                                                        | 14     | Further studies are required to replicate and confirm the findings                                                                                                                                                                        |



---

**Other information**

---

|         |    |                                                                                                                                                               |    |
|---------|----|---------------------------------------------------------------------------------------------------------------------------------------------------------------|----|
| Funding | 22 | Give the source of funding and the role of the funders for the present study and, if applicable, for the original study on which the present article is based | 14 |
|---------|----|---------------------------------------------------------------------------------------------------------------------------------------------------------------|----|

---

\*Give information separately for exposed and unexposed groups.

**Note:** An Explanation and Elaboration article discusses each checklist item and gives methodological background and published examples of transparent reporting. The STROBE checklist is best used in conjunction with this article (freely available on the Web sites of PLoS Medicine at <http://www.plosmedicine.org/>, Annals of Internal Medicine at <http://www.annals.org/>, and Epidemiology at <http://www.epidem.com/>). Information on the STROBE Initiative is available at <http://www.strobe-statement.org>.
